# Supplementary material for: Soluble oxide gate dielectrics prepared using the self-combustion reaction for high-performance thin-film transistors
Source: Royal Society of Chemistry journal article supplement (doi:10.1039/c4tc00874j), 2014-01-01
Supplement: c4tc00874j1.pdf [file c4tc00874j1.pdf]

## Soluble oxide gate dielectrics prepared using the self-combustion reaction for high-performance thin-film transistors

Eun Jin Bae,<sup>a</sup> Young Hun Kang,<sup>a</sup> Mijeong Han,<sup>a</sup> Changjin Lee,<sup>\*ab</sup> and Song Yun Cho<sup>\*a</sup>

*Additional Figures*

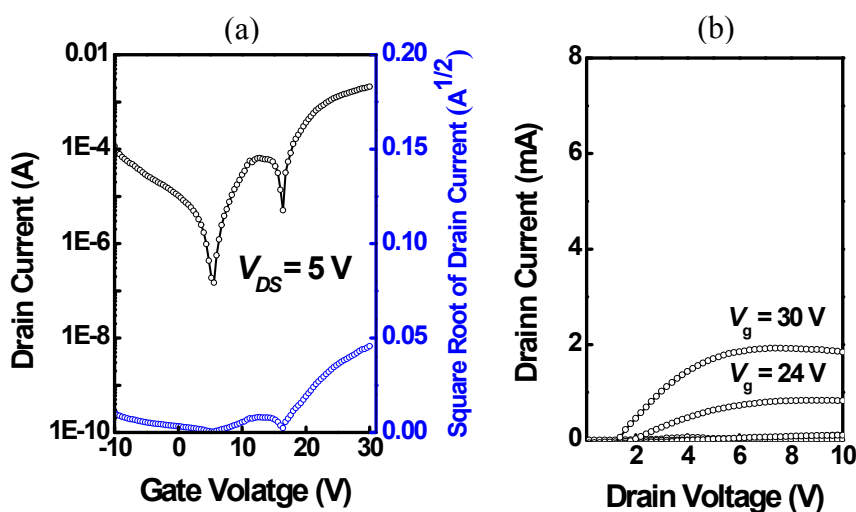

**Fig. S1** (a) The transfer and (b) output characteristics of ZnO TFT fabricated from non-combustive  $\text{AlO}_x$  gate dielectric with  $\text{Al}(\text{C}_2\text{H}_5\text{O}_2)_3$  precursor with GPTMS.

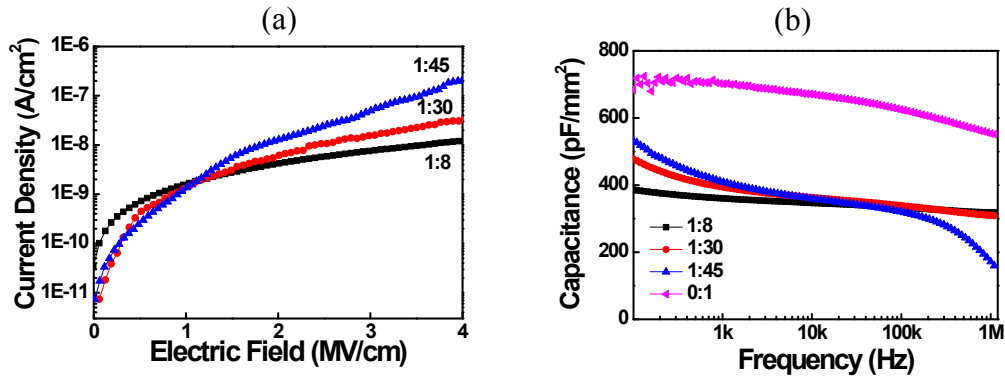

**Fig. S2** (a) Current density vs. electrical field and (b) dependence of capacitance on the frequency for self-combustive  $\text{AlO}_x$  thin films with various amounts of GPTMS.

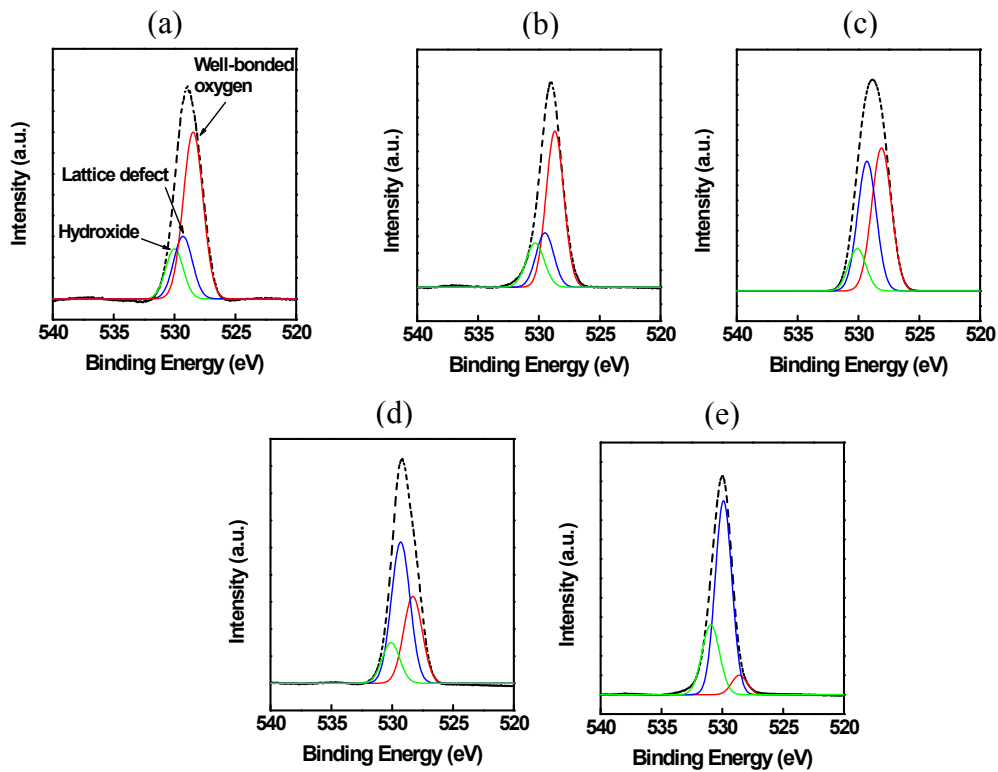

**Fig. S3** XPS spectra of  $\text{AlO}_x$  thin films prepared from various precursors: (a) self-combustive  $\text{AlO}_x$  precursor, (b) self-combustive  $\text{AlO}_x$  precursor with GPTMS, (c) combustive precursor with urea, (d) noncombustive  $\text{Al}(\text{NO}_3)_3 \cdot 9\text{H}_2\text{O}$ , and (e) noncombustive  $\text{Al}(\text{C}_2\text{H}_5\text{O}_2)_3$ .

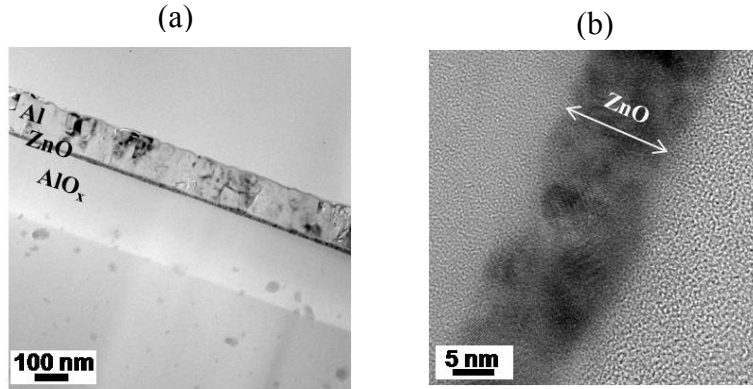

**Fig. S4** TEM cross sectional images of the ZnO TFT with self-combustive  $\text{AlO}_x$  gate dielectric:

(a) cross sectional TEM image of ZnO TFT and (b) cross sectional TEM image of magnified ZnO layer between  $\text{AlO}_x$  gate dielectric and Al electrode.

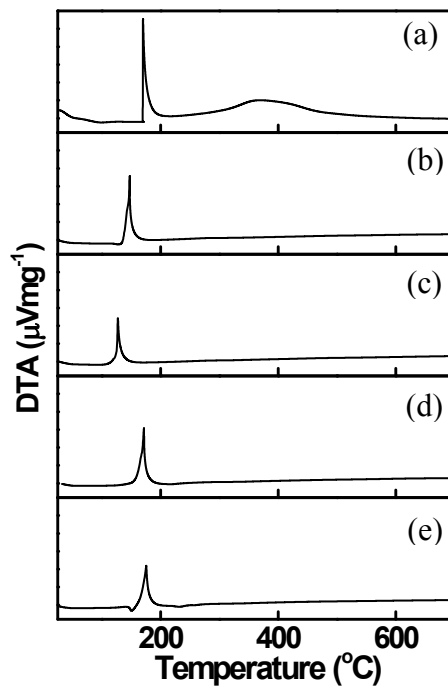

**Fig. S5** TG-DTA curves of combustive  $\text{AlO}_x$  precursors with different ratios of  $\text{Al}(\text{C}_2\text{H}_5\text{O}_2)_3$  to  $\text{Al}(\text{NO}_3)_3 \cdot 9\text{H}_2\text{O}$ : (a)  $\text{Al}(\text{C}_2\text{H}_5\text{O}_2)_3/\text{Al}(\text{NO}_3)_3 \cdot 9\text{H}_2\text{O} = 1/1$ , (b)  $\text{Al}(\text{C}_2\text{H}_5\text{O}_2)_3/\text{Al}(\text{NO}_3)_3 \cdot 9\text{H}_2\text{O} = 1/2$ , (c)  $\text{Al}(\text{C}_2\text{H}_5\text{O}_2)_3/\text{Al}(\text{NO}_3)_3 \cdot 9\text{H}_2\text{O} = 1/3$ , (d)  $\text{Al}(\text{C}_2\text{H}_5\text{O}_2)_3/\text{Al}(\text{NO}_3)_3 \cdot 9\text{H}_2\text{O} = 2/1$ , and (e)  $\text{Al}(\text{C}_2\text{H}_5\text{O}_2)_3/\text{Al}(\text{NO}_3)_3 \cdot 9\text{H}_2\text{O} = 3/1$ .

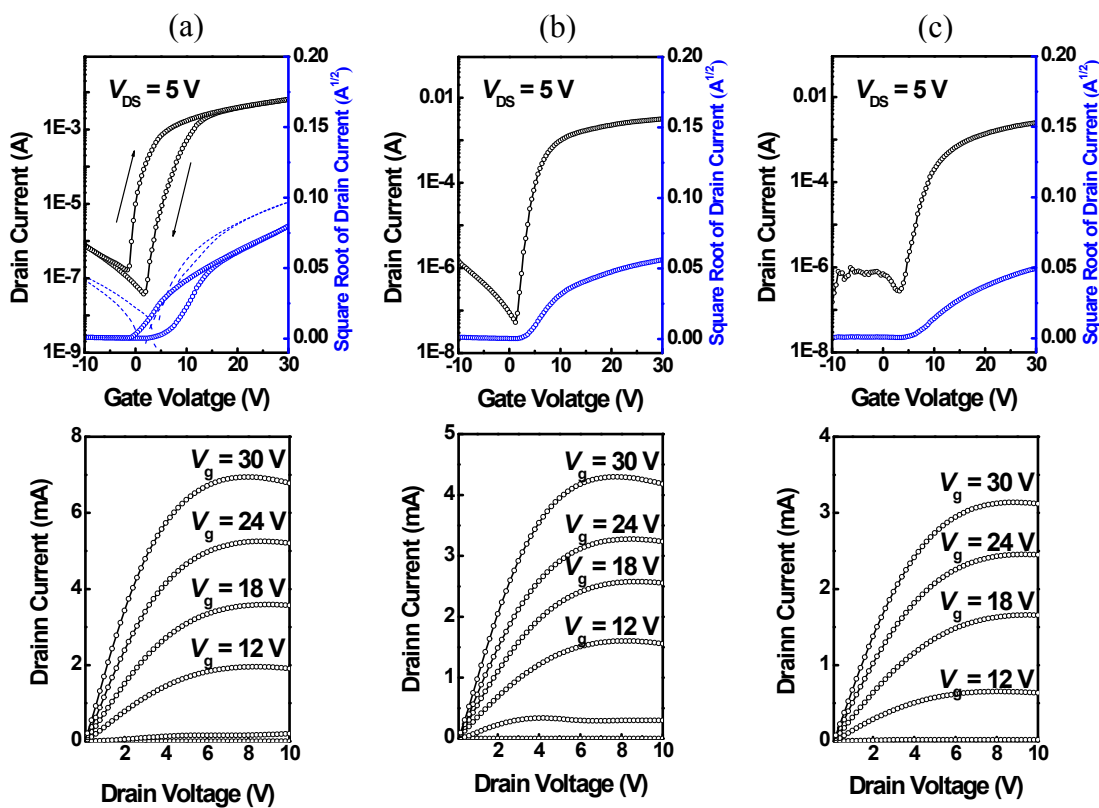

**Fig. S6** Transfer and output characteristics of the ZnO TFTs fabricated from  $\text{AlO}_x$  gate dielectrics with 1:8 ratios of the self-combustive  $\text{AlO}_x$  precursor to GPTMS depending on different composition ratios of  $\text{Al}(\text{C}_2\text{H}_5\text{O}_2)_3$  to  $\text{Al}(\text{NO}_3)_3 \cdot 9\text{H}_2\text{O}$ : (a)  $\text{Al}(\text{C}_2\text{H}_5\text{O}_2)_3/\text{Al}(\text{NO}_3)_3 \cdot 9\text{H}_2\text{O} = 1/1$ , (b)  $\text{Al}(\text{C}_2\text{H}_5\text{O}_2)_3/\text{Al}(\text{NO}_3)_3 \cdot 9\text{H}_2\text{O} = 1/3$ , (c)  $\text{Al}(\text{C}_2\text{H}_5\text{O}_2)_3/\text{Al}(\text{NO}_3)_3 \cdot 9\text{H}_2\text{O} = 3/1$ .

**Table S1** Characteristics of ZnO TFTs fabricated from AlO<sub>x</sub> gate dielectrics with 1:8 ratios of the self-combustive AlO<sub>x</sub> precursor to GPTMS depending on different composition ratios of Al(C<sub>2</sub>H<sub>5</sub>O<sub>2</sub>)<sub>3</sub>: Al(NO<sub>3</sub>)<sub>3</sub>·9H<sub>2</sub>O

| molar ratio<br>(Al(C <sub>2</sub> H <sub>5</sub> O <sub>2</sub> ) <sub>3</sub> :<br>Al(NO <sub>3</sub> ) <sub>3</sub> ·9H <sub>2</sub> O) | mobility <sup>a</sup><br>(cm <sup>2</sup> V <sup>-1</sup> s <sup>-1</sup> ) | threshold<br>voltage (V) | on/off ratio |
|-------------------------------------------------------------------------------------------------------------------------------------------|-----------------------------------------------------------------------------|--------------------------|--------------|
| 1:1                                                                                                                                       | 24.7                                                                        | 6.35                     | 1.71E + 05   |
| 1:3                                                                                                                                       | 20.6                                                                        | 3.04                     | 6.00E + 04   |
| 3:1                                                                                                                                       | 6.56                                                                        | 5.61                     | 1.610E + 04  |

<sup>a</sup>Calculated from capacitance values extrapolated to a frequency of 1 Hz

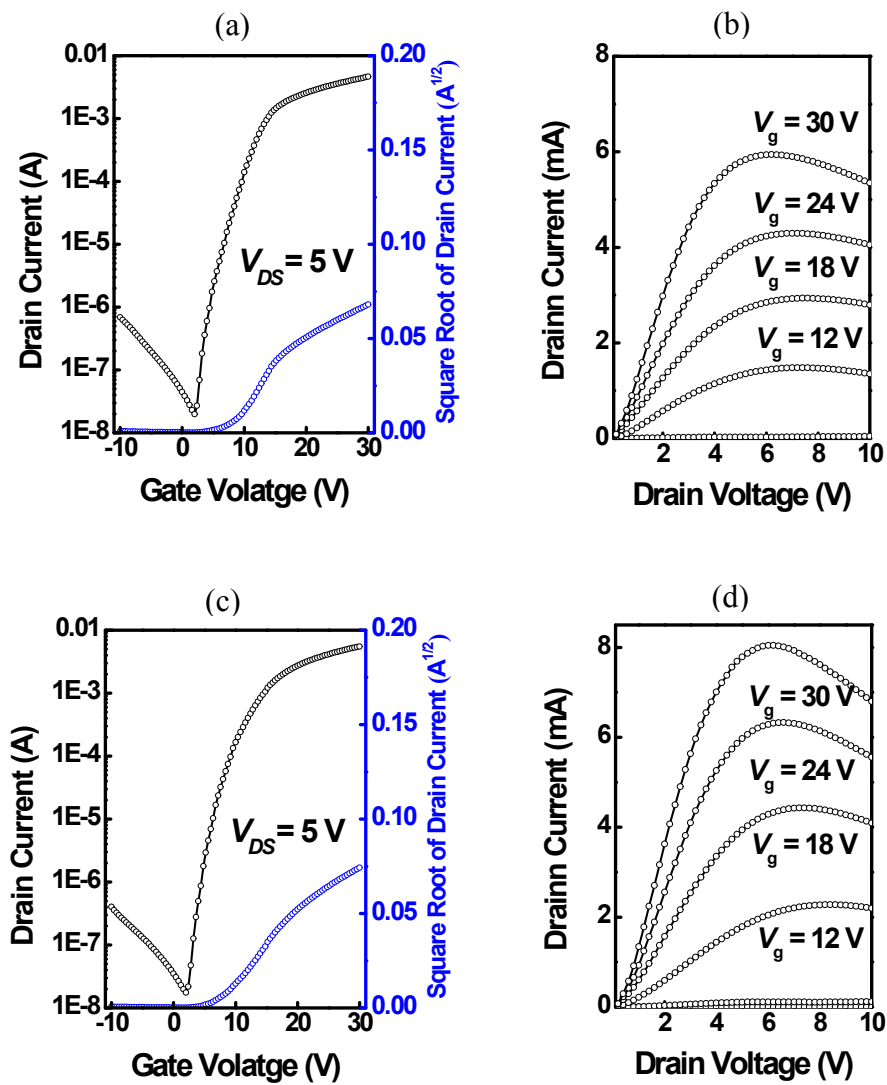

**Fig. S7** (a) Transfer and (b) output characteristics of the ZnO TFTs fabricated from  $AlO_x$  gate dielectrics with 1:30 ratios of the self-combustive  $AlO_x$  precursor to GPTMS. (c) Transfer and (d) output characteristics of the ZnO TFTs fabricated from  $AlO_x$  gate dielectrics with 1:45 ratios of the self-combustive  $AlO_x$  precursor to GPTMS.

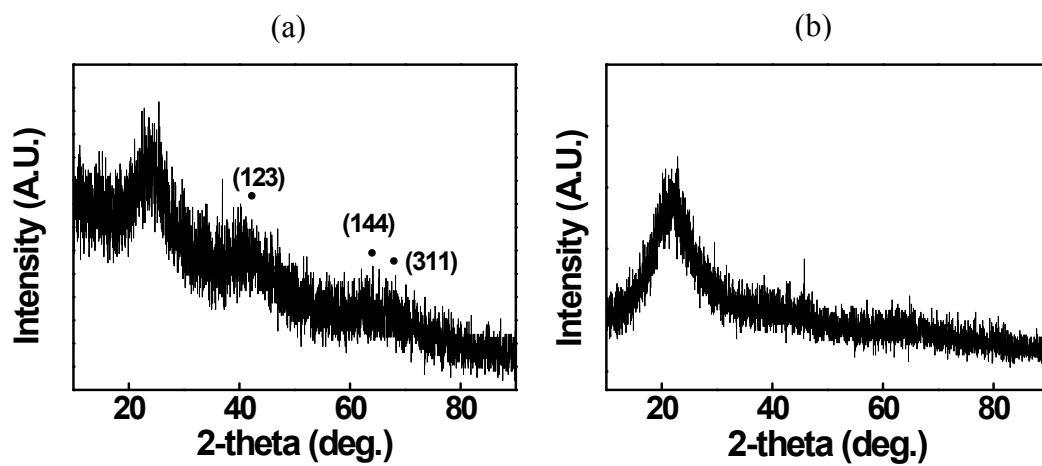

**Fig. S8** XRD pattern of the (a) self-combustive and (b) non-combustive  $\text{AlO}_x$  films deposited on the glass substrate after annealing at  $250^\circ\text{C}$ .
